# Supplementary material for: Physiological and Transcriptomic Analysis Provides Insights into Low Nitrogen Stress in Foxtail Millet (Setaria italica L.)
Source: MDPI journal article supplement (doi:10.3390/ijms242216321), 2023-11-14
Supplement: s1 [file s1]

**Supplemental Table S1** The gene-specific primes for selected DEGs

| Gene ID   | Primer                  | Sequence(5'—3')          |
|-----------|-------------------------|--------------------------|
| 101753893 | Seita.3G110700-10G-qRTF | GGATGAAGCTCCTGCTCAAG     |
|           | Seita.3G110700-10G-qRTR | CGATGTTGCCGACGATGA       |
| 101754330 | Seita.9G475300-11G-qRTF | GCCTGGAGCACATTAGCA       |
|           | Seita.9G475300-11G-qRTR | CCGTCGTAGAAGAACCTGAG     |
| 101757408 | Seita.8G130200-28G-qRTF | GGTGGTGGACGATACCTTCA     |
|           | Seita.8G130200-28G-qRTR | CAGTGGTGTTGCTTCCCTTT     |
| 101761991 | Seita.3G143100-22G-qRTF | CGCTCGCCTACTATGGTGA      |
|           | Seita.3G143100-22G-qRTR | CACACGCCCTGACTCAATC      |
| 101764145 | Seita.3G014700-4G-qRTF  | GCCGTTCCAGAAGTTCATCA     |
|           | Seita.3G014700-4G-qRTR  | TCCTTGTTCCAGCTCCAGTA     |
| 101767747 | Seita.5G396500-35G-qRTF | CCTCCTCATCTCCGTCATTG     |
|           | Seita.5G396500-35G-qRTR | GAGCAGCCAGTAGAAGTAGTC    |
| 101771644 | Seita.5G238500-32G-qRTF | CGGTGTACGACAAGGAGAC      |
|           | Seita.5G238500-32G-qRTR | CACCTGTATGCGGGGAAG       |
| 101772106 | Seita.3G034900-8G-qRTF  | GGA CTCCACCTTAGAAGATGACT |
|           | Seita.3G034900-8G-qRTR  | CTGCTGTTCCCACCGAATATC    |
| 101772473 | Seita.6G159400-9G-qRTF  | ACACGCTGGACCAGATCA       |
|           | Seita.6G159400-9G-qRTR  | CGTTGACGCAGAAGTAGAGC     |
| 101773925 | Seita.9G440900-2G-qRTF  | CAGGCAGAAGGAGCAGTTC      |
|           | Seita.9G440900-2G-qRTR  | TTGTTGACAGGCGTGTGT       |
| 101774390 | Seita.7G093500-14G-qRTF | CACCATCGGGAAGCAGAG       |
|           | Seita.7G093500-14G-qRTR | GTAGGCTCCGCACTTGTAG      |
| 101775495 | Seita.8G170100-13G-qRTF | AAGGTGACGAACCGTGCTA      |
|           | Seita.8G170100-13G-qRTR | CCGTTGGTGTCGATCTTCTTG    |
| 101776721 | Seita.8G200200-12G-qRTF | TGGCTGGAGCATGGAGTA       |
|           | Seita.8G200200-12G-qRTR | TGCTTGAACAGGACGAGTG      |
| 101779143 | Seita.2G289500-20G-qRTF | CGGACGGCAAGTCATTCAT      |
|           | Seita.2G289500-20G-qRTR | GAGTTGAGCATCCAGGTGTAG    |
| 101784607 | Seita.1G031400-33G-qRTF | GTGTTGAGACCAAGGTAGC      |
|           | Seita.1G031400-33G-qRTR | TGATGTCCTCGTCCCTAACC     |

**Supplemental Table S2** Differentially expressed genes (DEGs) of two foxtail millet genotypes under control and low nitrogen conditions.

| Part  | Comparison       | DEGs | Upregulated | Downregulated |
|-------|------------------|------|-------------|---------------|
| Shoot | JG20LN vs JG20CK | 4256 | 2214        | 2042          |
|       | JG22LN vs JG22CK | 1291 | 431         | 860           |
|       | JG22CK vs JG20CK | 3581 | 1346        | 2235          |
|       | JG22LN vs JG20LN | 1132 | 457         | 675           |
| Root  | JG20LN vs JG20CK | 3191 | 1862        | 1329          |
|       | JG22LN vs JG22CK | 1881 | 1115        | 766           |
|       | JG22CK vs JG20CK | 3852 | 1547        | 2305          |
|       | JG22LN vs JG20LN | 2028 | 932         | 1096          |

**Supplemental Table S3** Number and percentage of differentially expressed TFs between two different foxtail millet varieties in response to LN condition.

| TF terms      | Shoot<br>JG20LN vs<br>JG20CK | Shoot<br>Common | Shoot<br>JG22LN vs<br>JG22CK | Root<br>JG20LN vs<br>JG20CK | Root<br>common | Root<br>JG22LN vs JG22CK |
|---------------|------------------------------|-----------------|------------------------------|-----------------------------|----------------|--------------------------|
| bHLH          | 18(12.5%)                    | 3(16.7%)        | 6(16.2%)                     | 8(7.1%)                     | 1(3.0%)        | 6(5.7%)                  |
| bZIP          | 5(3.5%)                      | 1(5.6%)         | 3(8.1%)                      | 7(6.2%)                     | 2(6.1%)        | 3(2.9%)                  |
| DIVARICATA    | 2(1.4%)                      | 1(5.6%)         | 1(2.7%)                      | 2(1.8%)                     | 1(3.0%)        | 2(1.9%)                  |
| ERF           | 25(17.4%)                    | 1(5.6%)         | 3(8.1%)                      | 22(19.5%)                   | 7(21.2%)       | 23(21.9%)                |
| GATA          | 4(2.8%)                      | 0(0.0%)         | 0(0.0%)                      | 3(2.7%)                     | 1(3.0%)        | 2(1.9%)                  |
| HHO           | 2(1.4%)                      | 1(5.6%)         | 1(2.7%)                      | 1(0.9%)                     | 1(3.0%)        | 2(1.9%)                  |
| Hsf           | 5(3.5%)                      | 1(5.6%)         | 3(8.1%)                      | 2(1.8%)                     | 1(3.0%)        | 3(2.9%)                  |
| IBH(S)/HBP(R) | 2(1.4%)                      | 1(5.6%)         | 1(2.7%)                      | 1(0.9%)                     | 1(3.0%)        | 1(1.0%)                  |
| MADS          | 4(2.8%)                      | 2(11.1%)        | 4(10.8%)                     | 4(3.5%)                     | 0(0.0%)        | 2(1.9%)                  |
| MYB           | 12(8.3%)                     | 2(11.1%)        | 6(16.2%)                     | 6(5.3%)                     | 1(3.0%)        | 7(6.7%)                  |
| MYC           | 1(0.7%)                      | 0(0.0%)         | 0(0.0%)                      | 0(0.0%)                     | 0(0.0%)        | 1(1.0%)                  |
| NAC           | 1(0.7%)                      | 1(5.6%)         | 1(2.7%)                      | 0(0.0%)                     | 0(0.0%)        | 1(1.0%)                  |
| NF-Y          | 6(4.2%)                      | 0(0.0%)         | 0(0.0%)                      | 4(3.5%)                     | 3(9.1%)        | 4(3.8%)                  |
| PCF           | 3(2.1%)                      | 0(0.0%)         | 0(0.0%)                      | 1(0.9%)                     | 1(3.0%)        | 2(1.9%)                  |
| RAX           | 2(1.4%)                      | 0(0.0%)         | 0(0.0%)                      | 0(0.0%)                     | 0(0.0%)        | 2(1.9%)                  |
| TCP           | 2(1.4%)                      | 0(0.0%)         | 0(0.0%)                      | 1(0.9%)                     | 0(0.0%)        | 0(0.0%)                  |
| TGAL          | 3(2.1%)                      | 0(0.0%)         | 0(0.0%)                      | 8(7.1%)                     | 3(9.1%)        | 3(2.9%)                  |
| Trihelix      | 1(0.7%)                      | 0(0.0%)         | 2(5.4%)                      | 2(1.8%)                     | 0(0.0%)        | 7(6.7%)                  |
| WRKY          | 29(20.1%)                    | 0(0.0%)         | 0(0.0%)                      | 11(9.7%)                    | 6(18.2%)       | 25(23.8%)                |
| others        | 17(11.8%)                    | 4(22.2%)        | 6(16.2%)                     | 30(26.5%)                   | 4(12.1%)       | 9(8.6%)                  |
| Total         | 144(100%)                    | 18(100%)        | 37(100%)                     | 113(100.0%)                 | 33(100.0%)     | 105(100.0%)              |

**Supplemental Table S4** The DEGs related with Starch and sucrose metabolism in two varieties.

| Parts      | Shoots        |           |               |           | Roots         |           |               |           |
|------------|---------------|-----------|---------------|-----------|---------------|-----------|---------------|-----------|
| Treatments | LNJG20-CKJG20 |           | LNJG22-CKJG22 |           | LNJG20-CKJG20 |           | LNJG22-CKJG22 |           |
| UP/DOWN    | UP            | DOWN      | UP            | DOWN      | UP            | DOWN      | UP            | DOWN      |
| Gene ID    | 101761744     | 101765726 | 101756806     | 101783222 | 101754475     | 101765726 | 101773502     | 101765726 |
| Gene ID    | 101756806     | 101765746 | 101778895     | 101786399 | 101781847     | 101754626 | 101768458     | 101777643 |
| Gene ID    | 101766064     | 101769822 | 101753890     | 101765726 | 101773502     | 101783222 | 101765746     | 105914669 |
| Gene ID    | 101759340     | 101773215 |               | 101773215 | 101781445     | 101784113 | 101786613     | 101784144 |
| Gene ID    | 101760963     | 101756027 |               | 101765746 | 101784519     | 101774056 | 101779998     | 101769336 |
| Gene ID    | 101763600     | 101776290 |               | 101774746 | 101775037     | 101755255 | 101770526     | 101784175 |
| Gene ID    | 101755745     | 101766477 |               | 101776688 | 101776290     | 101765110 |               | 101786459 |
| Gene ID    | 101758779     | 101775884 |               | 101784175 | 101775239     | 101784144 |               | 101774056 |
| Gene ID    | 101755613     | 101776688 |               |           | 101786844     | 101752753 |               |           |
| Gene ID    | 101786613     | 101754626 |               |           | 101772298     | 101759310 |               |           |
| Gene ID    | 101778895     | 101752753 |               |           |               | 101784175 |               |           |
| Gene ID    | 101781208     | 101785561 |               |           |               | 101774804 |               |           |
| Gene ID    | 101781159     | 101755626 |               |           |               | 101777786 |               |           |
| Gene ID    | 101782849     | 101768057 |               |           |               | 101754303 |               |           |
| Gene ID    | 101753874     | 101768040 |               |           |               | 101775414 |               |           |
| Gene ID    | 101781445     | 101769477 |               |           |               | 101786399 |               |           |
| Gene ID    | 101784519     | 101774746 |               |           |               | 101774746 |               |           |
| Gene ID    | 101753890     | 101768017 |               |           |               | 101768458 |               |           |
| Gene ID    | 101754475     | 101760405 |               |           |               | 101777643 |               |           |
| Gene ID    | 101764238     | 101758109 |               |           |               |           |               |           |
| Gene ID    | 105914669     | 101775414 |               |           |               |           |               |           |
| Gene ID    |               | 101782643 |               |           |               |           |               |           |
| Gene ID    |               | 101780809 |               |           |               |           |               |           |
| Gene ID    |               | 101786924 |               |           |               |           |               |           |
| Gene ID    |               | 101765386 |               |           |               |           |               |           |

**Supplemental Table S5** The DEGs related with photosynthesis in two varieties.

| Gene ID   | Gene Item | LNJG20-CKJG20 | LNJG22-CKJG22 |
|-----------|-----------|---------------|---------------|
| 19526781  | PsaA      | DOWN          | DOWN          |
| 101755060 | PsaK      | DOWN          | DOWN          |
| 101759541 | PsaN      | DOWN          | DOWN          |
| 101771677 | PsaO      | DOWN          | DOWN          |
| 101779542 | PsaG      | DOWN          | DOWN          |
| 101785215 | PsaH      | DOWN          | DOWN          |
| 19526757  | PsbC      | DOWN          | DOWN          |
| 101753687 | PsbQ      | UP            | DOWN          |
| 101785134 | PsbA      | DOWN          | DOWN          |
| 19526775  | b         | UP            | DOWN          |
| 101767618 | LHC       | DOWN          | DOWN          |

**Supplemental Table S6** The DEGs related with Plant hormone signal transduction in two varieties.

| gene_id   | Gene Item      | Shoot         |               | Root          |               |
|-----------|----------------|---------------|---------------|---------------|---------------|
|           |                | LNJG20-CKJG20 | LNJG22-CKJG22 | LNJG20-CKJG20 | LNJG22-CKJG22 |
| 101770000 | Auxin          | AUX/IAA       | DOWN          | DOWN          | UP            |
| 101763152 |                | AUX/IAA       | UP            | UP            | UP            |
| 101756773 |                | AUX/IAA       | UP            | UP            | DOWN          |
| 101786423 |                | AUX/IAA       | UP            | DOWN          | UP            |
| 101776449 |                | AUX/IAA       | UP            | UP            | UP            |
| 101776224 |                | AUX/IAA       | DOWN          | UP            | UP            |
| 101771394 |                | AUX/IAA       | DOWN          | DOWN          | UP            |
| 101776797 |                | AUX/IAA       | UP            | UP            | UP            |
| 101773098 |                | AUX/IAA       | DOWN          | UP            | DOWN          |
| 101782847 |                | ARF           | UP            | UP            | UP            |
| 101786550 |                | ARF           | UP            | UP            | UP            |
| 101759755 |                | ARF           | UP            | UP            | UP            |
| 101770279 |                | GH3           | DOWN          | UP            | UP            |
| 101786612 |                | GH3           | DOWN          | UP            | UP            |
| 101777525 |                | GH3           | DOWN          | DOWN          | UP            |
| 101768288 |                | GH3           | UP            | UP            | UP            |
| 101768539 |                | SAUR          | DOWN          | UP            | UP            |
| 101755080 |                | SAUR          | DOWN          | UP            | UP            |
| 101757474 |                | SAUR          | DOWN          | UP            | UP            |
| 101773025 |                | SAUR          | DOWN          | UP            | UP            |
| 101786592 |                | SAUR          | DOWN          | DOWN          | DOWN          |
| 101759405 | Cytokinin      | SAUR          | UP            | UP            | UP            |
| 101774716 |                | SAUR          | DOWN          | UP            | UP            |
| 101776313 |                | SAUR          | DOWN          | DOWN          | DOWN          |
| 101776714 |                | SAUR          | DOWN          | DOWN          | DOWN          |
| 101784781 |                | SAUR          | UP            | UP            | UP            |
| 101768762 |                | AHP           | UP            | UP            | UP            |
| 101759627 |                | AHP           | UP            | UP            | UP            |
| 101773981 |                | AHP           | UP            | UP            | UP            |
| 101782248 | Gibberellin    | AHP           | UP            | DOWN          | DOWN          |
| 101785369 |                | B-ARR         | UP            | UP            | UP            |
| 101781296 |                | A-ARR         | UP            | DOWN          | UP            |
| 101767490 |                | A-ARR         | UP            | UP            | UP            |
| 101778881 | Ethylene       | A-ARR         | UP            | UP            | UP            |
| 101775649 |                | TF            | DOWN          | UP            | UP            |
| 101758377 | Absciscic acid | EBF1/2        | DOWN          | DOWN          | DOWN          |
| 101778576 |                | EIN3          | UP            | DOWN          | DOWN          |
| 101766570 |                | EIN3          | DOWN          | DOWN          | DOWN          |
| 101785783 | PP2C           | PYR/PYL       | UP            | DOWN          | UP            |
| 101776342 |                | PYR/PYL       | UP            | UP            | UP            |
| 101786686 |                | PYR/PYL       | UP            | DOWN          | UP            |
| 101769449 |                | PP2C          | DOWN          | UP            | DOWN          |
| 101753735 |                | PP2C          | DOWN          | UP            | DOWN          |

|           |       |      |      |      |      |
|-----------|-------|------|------|------|------|
| 101783265 | PP2C  | DOWN | DOWN | DOWN | UP   |
| 101768564 | PP2C  | DOWN | DOWN | UP   | DOWN |
| 101780602 | PP2C  | DOWN | DOWN | DOWN | DOWN |
| 101764618 | SnRK2 | DOWN | DOWN | DOWN | DOWN |
| 101763654 | SnRK2 | DOWN | DOWN | DOWN | UP   |
| 101775125 | SnRK2 | DOWN | DOWN | DOWN | DOWN |
| 101765115 | SnRK2 | UP   | DOWN | UP   | UP   |
| 101757593 | ABF   | DOWN | DOWN | UP   | DOWN |
| 101776070 | ABF   | DOWN | DOWN | DOWN | DOWN |
| 101778442 | ABF   | DOWN | DOWN | UP   | DOWN |
| 101758999 | ABF   | UP   | UP   | UP   | UP   |

---

**Supplemental Table S7** The DEGs related with glycolysis in two varieties.

| gene_id   | Gene Item       | Shoot         |               | Root          |               |
|-----------|-----------------|---------------|---------------|---------------|---------------|
|           |                 | LNJG20-CKJG20 | LNJG22-CKJG22 | LNJG20-CKJG20 | LNJG22-CKJG22 |
| 101754626 |                 | DOWN          | UP            | DOWN          | DOWN          |
| 101775414 | H XK            | DOWN          | DOWN          | DOWN          | DOWN          |
| 101784144 |                 | DOWN          | UP            | DOWN          | DOWN          |
| 101772215 | AEP             | DOWN          | DOWN          | DOWN          | UP            |
| 101771409 |                 | UP            | DOWN          | UP            | UP            |
| 101754303 | GPI             | UP            | UP            | DOWN          | DOWN          |
| 101778700 |                 | DOWN          | DOWN          | DOWN          | DOWN          |
| 101780397 |                 | DOWN          | DOWN          | DOWN          | DOWN          |
| 101780059 | ATP-PFK         | DOWN          | DOWN          | UP            | UP            |
| 101756322 |                 | UP            | UP            | DOWN          | UP            |
| 101756917 |                 | UP            | DOWN          | DOWN          | DOWN          |
| 101786189 |                 | UP            | UP            | UP            | DOWN          |
| 101756517 | FBA             | DOWN          | DOWN          | DOWN          | DOWN          |
| 101754112 |                 | DOWN          | DOWN          | DOWN          | DOWN          |
| 101760718 | TIM             | UP            | UP            | UP            | UP            |
| 101785151 |                 | DOWN          | DOWN          | DOWN          | DOWN          |
| 101768835 |                 | DOWN          | DOWN          | DOWN          | DOWN          |
| 101759360 | PGK             | DOWN          | DOWN          | DOWN          | DOWN          |
| 101785907 |                 | UP            | UP            | UP            | UP            |
| 101775268 |                 | DOWN          | DOWN          | DOWN          | DOWN          |
| 101783820 |                 | DOWN          | DOWN          | UP            | UP            |
| 101776203 |                 | DOWN          | DOWN          | DOWN          | UP            |
| 101763575 | PGMP            | UP            | UP            | UP            | DOWN          |
| 101771740 |                 | DOWN          | DOWN          | DOWN          | DOWN          |
| 101757916 |                 | DOWN          | UP            | DOWN          | DOWN          |
| 101781167 | ENO             | DOWN          | DOWN          | DOWN          | UP            |
| 101769604 |                 | DOWN          | DOWN          | DOWN          | DOWN          |
| 101783767 | PCK             | UP            | UP            | UP            | DOWN          |
| 101768352 |                 | DOWN          | DOWN          | DOWN          | DOWN          |
| 101759427 |                 | DOWN          | DOWN          | DOWN          | DOWN          |
| 101769537 | PK              | UP            | DOWN          | UP            | UP            |
| 101780488 |                 | DOWN          | DOWN          | DOWN          | DOWN          |
| 101784708 |                 | UP            | UP            | UP            | UP            |
| 101763108 | PDH-E1 $\alpha$ | DOWN          | DOWN          | DOWN          | UP            |
| 101775698 | PDC             | DOWN          | DOWN          | DOWN          | DOWN          |
| 101763713 | PDH-E2          | DOWN          | DOWN          | UP            | UP            |
| 101769555 |                 | UP            | DOWN          | UP            | UP            |
| 101756978 | DLD             | DOWN          | DOWN          | UP            | UP            |
| 101782764 |                 | DOWN          | DOWN          | UP            | UP            |
| 101761749 |                 | UP            | UP            | UP            | UP            |
| 101755454 | ALDH            | UP            | UP            | UP            | DOWN          |
| 101776963 |                 | UP            | UP            | DOWN          | UP            |
| 101762488 |                 | DOWN          | UP            | DOWN          | UP            |



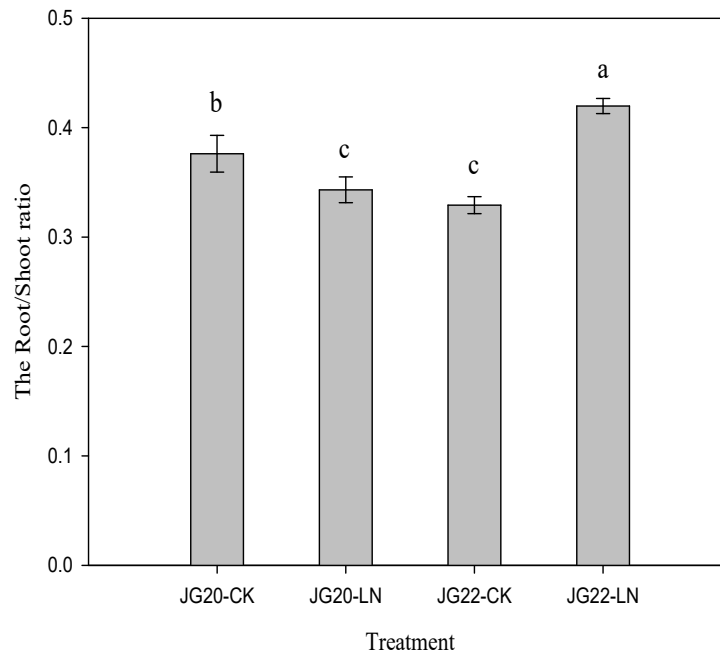

**Supplemental Figure S1** The root/shoot ratio in two foxtail millet varieties under control and low nitrogen conditions. JG20-CK, JG20 under control; JG20-LN, JG20 under low nitrogen; JG22-CK, JG22 under control; JG22-LN, JG22 under low nitrogen. Error bars represented standard error of three biological replicates; Lowercase indicates significance at the level of  $P < 0.05$ .
